# Supplementary material
Source: HighWire-hosted journal article supplement (doi:10.1101/rna.034181.112)
Supplement: SuppFigLegends.docx [file SuppFigLegends.docx]

**Supplemental Figure 1.**

A. **Multiple sequence alignment of extended Tudor domains from murine TDRD proteins**. Blue arrows show the conserved aromatic cage residues and red arrows indicate other significant conserved residues present in the extended Tudor domain (eTud) fold. Domains potentially inactive for methyl-arginine binding are indicated with an asterisk.

B. Comparison of the aromatic cages of Tudor3-R45me2 (blue) and Apo-Tudor3 (red) crystal structures.

**Supplemental Figure 2.**

**Domains TD2 and TD3 of TDRD1 bind sDMA-containing ligands in the fast-exchange regime on the NMR chemical shift time scale.** Each titration was monitored by 1H, 15N HSQC spectra of 15N-labeled TD2 or TD3 with successive addition of each unlabelled ligand (black: free TD, red: ligand saturated TD). For the peaks annotated in the overlay spectra, non-linear regression fitting estimates of the dissociation constant were performed. The apparent *KD* values represent the mean with the standard deviation for the ten cross-peaks. On average, each curve has a fitting error of 10%.

**Supplemental Figure 3.**

A. Representative ITC experiments of single TDs of TDRD1 with single arginine unmethylated (Runmethylated) and monomethylated (MMA).

B. Antibody detection of methylated arginines in endogenous murine proteinsused in pull-down assays of single and multiple TDs of TDRD1. Left: Antibody against symmetrical dimethylated arginines (Y12). Right: Antibody against asymmetrical (aSYM11) dimethylated arginines. Size markers in kilo-Daltons are indicated.
